# Supplementary material
Source: PubMed Central journal article supplement (PMC6413835)
Supplement: jciinsight-4-121905-s025.pdf [file jciinsight-4-121905-s025.pdf]

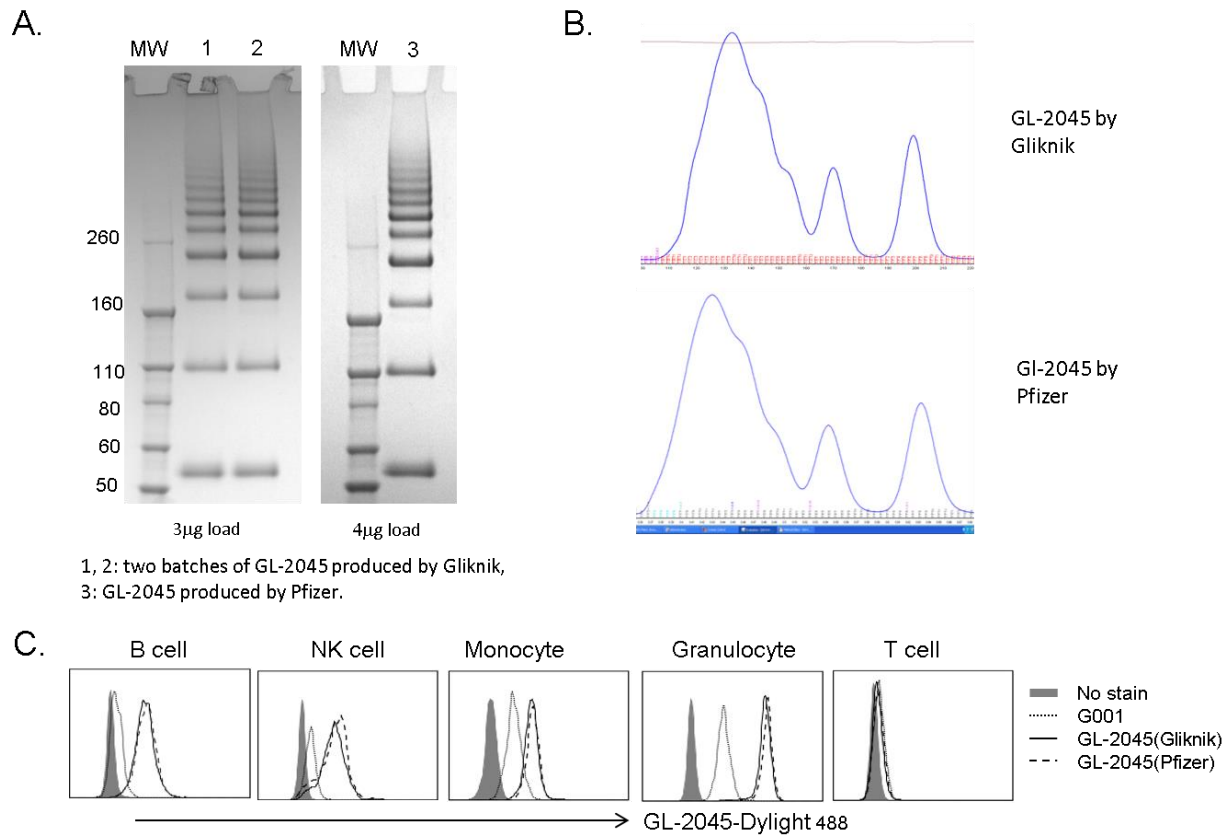

**Supplemental Figure 1: Comparison of different preparations of GL-2045.** Different batches of GL-2045 prepared by Gliknik or Pfizer were analyzed for the levels of multimerization by non-denatured SDS-PAGE (A) and gel filtration (B). (C) Two different GL-2045 preparations from Gliknik and Pfizer were labeled with Dylight 488. The binding of GL-2045 to immune cell populations from human peripheral blood were analyzed by FACS.

**A.****IVIG**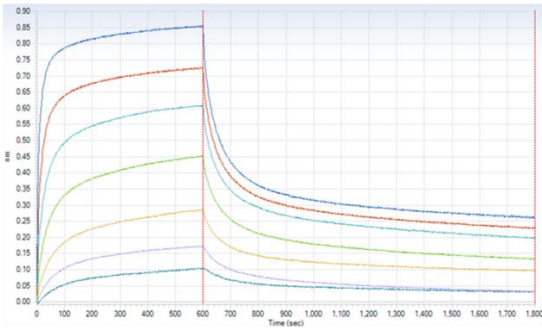**B.****GL-2045**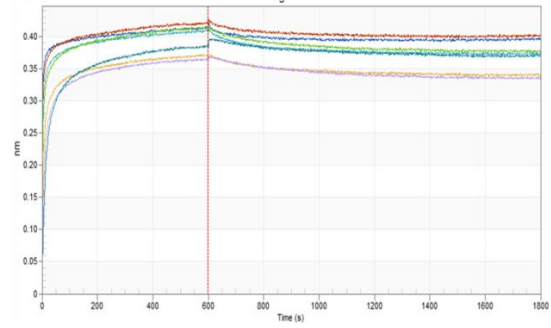**C.****Human IgG1**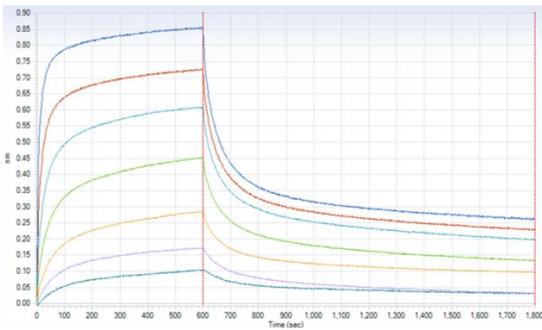**D.****DC-SIGN**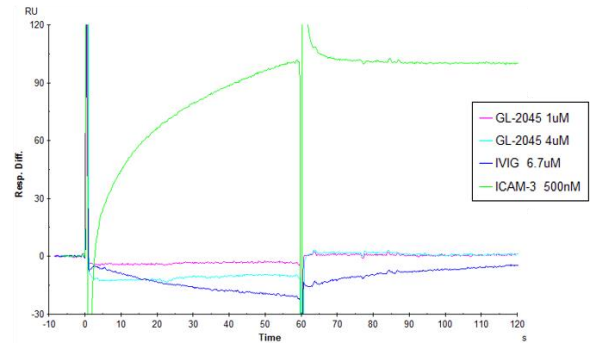

**Supplemental Figure 2: GL-2045 binds Fc $\gamma$ RIIIa with high avidity, but does not bind DC-SIGN.**

Representative BLI sensograms of binding of (A) IVIG, (B) GL-2045 and (C) Human IgG1 to Fc $\gamma$ RIIIa.

(D) GL-2045 and IVIG do not bind DC-SIGN using similar binding conditions and analyte concentrations.

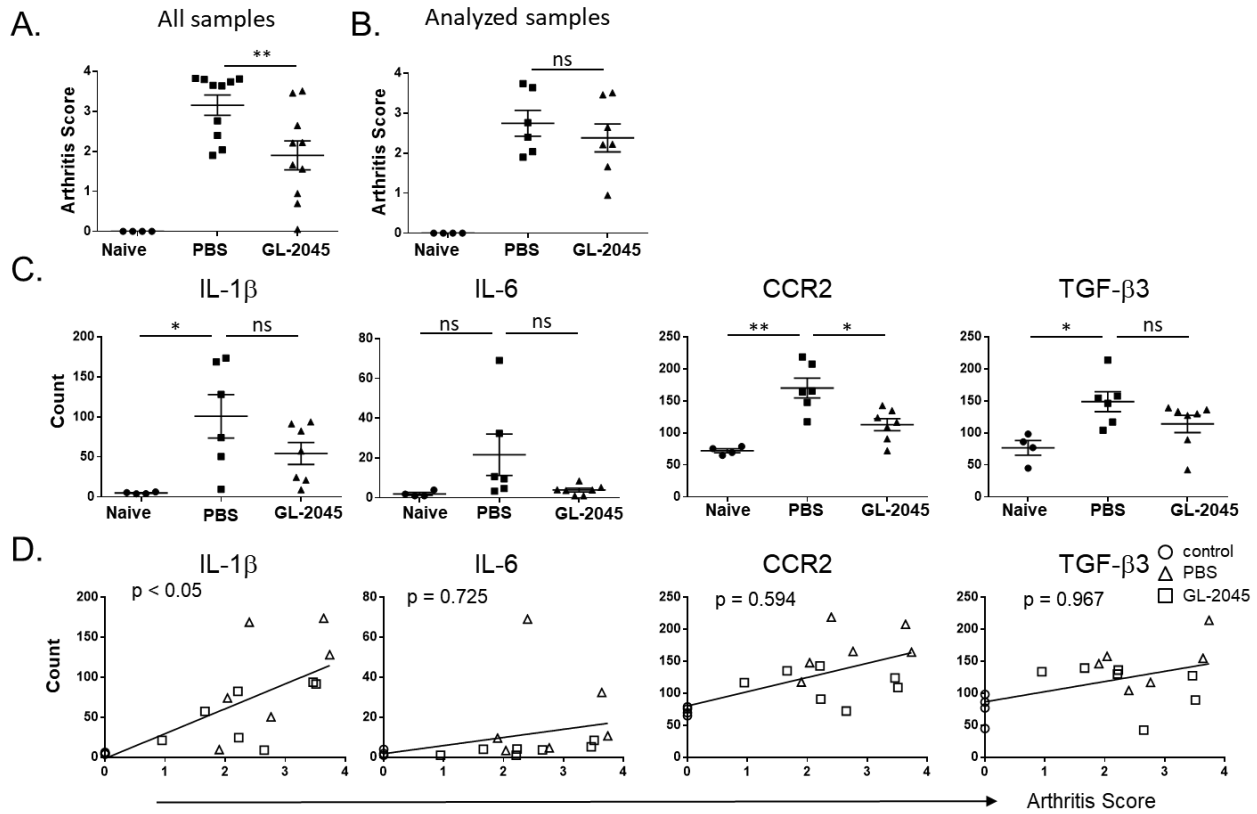

**Supplemental Figure 3. mRNA expression analysis of GL-2045-treated joints reveals reduced levels of cytokine and chemokine receptors.** (A) All samples: there were 4, 10, and 10 animals for naive, diseased-vehicle treated (PBS), and diseased-GL-2045 treated (GL-2045) groups, respectively. GL-2045 treatment significantly reduced the arthritis score ( $p=0.007$ , two tailed Mann-Whitney test) compared to the vehicle treated group. (B) Samples analyzed with NanoString: after NanoString quality control checks, a total of 4 samples from the naive group, 6 from PBS- treated group and 7 from GL-2045 treated group were suitable for analysis. With the reduced sample size, statistically significant differences in arthritis score between the vehicle-treated, and GL-2045-treated groups were not evident. (C) mRNA expression of IL-1 $\beta$ , IL-6, CCR2, and TGF- $\beta$ 3 in the joints of naïve, diseased vehicle-treated and diseased GL-2045-treated mice were analyzed by NanoString. Absolute gene expression counts are shown. \* $p<0.05$ , \*\* $p<0.01$ , ns denotes not significant. One-way ANOVA with Tukey correction. (D) Association of mRNA expression of IL-1 $\beta$ , IL-6, CCR2, and TGF- $\beta$ 3 with arthritis scores in individual animals. Linear models adjusted for group were used to test the significance of the linear association.

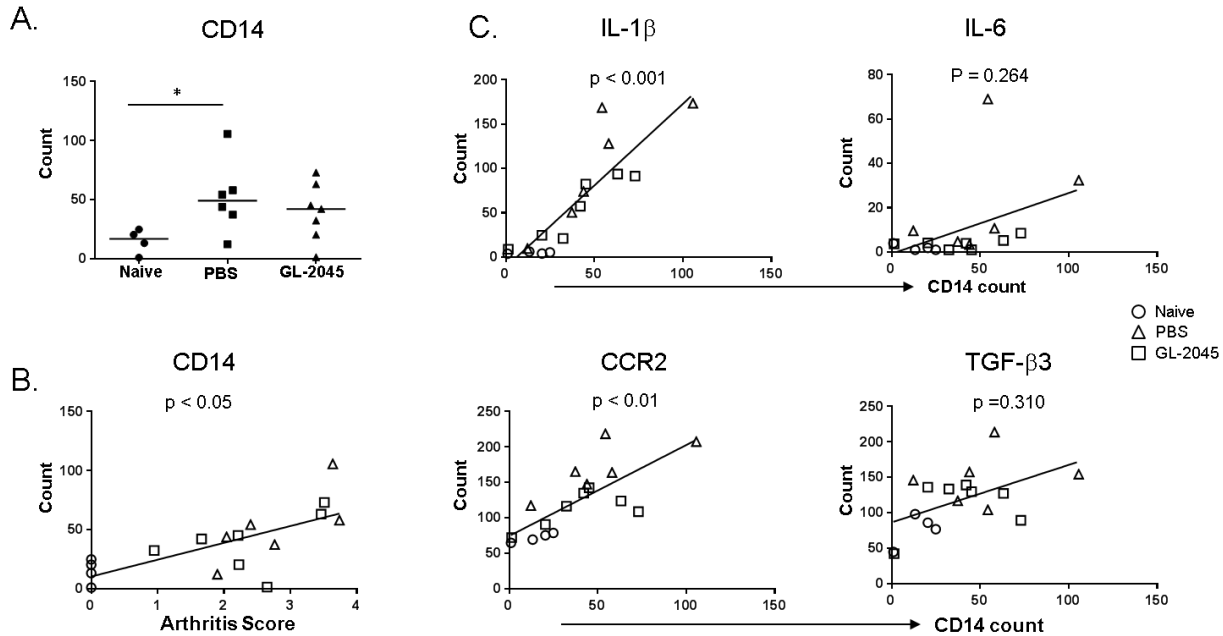

**Supplemental Figure 4. CD14 mRNA expression correlates with arthritis score and the expression of IL-1 $\beta$  and CCR2 in the joints of CIA mice.** (A) mRNA expression of CD14 in the joints of naïve (n=4), diseased vehicle-treated (PBS)(n=6), and diseased GL-2045-treated (GL-2045) mice (n=7) were assessed by Nanostring. CD14 mRNA expression is shown as absolute gene expression counts. \*  $p < 0.05$ , One-way ANOVA with Tukey correction. Association of CD14 mRNA expression with arthritis score (B) and with mRNA expression of IL-1 $\beta$ , IL-6, CCR2, and TGF- $\beta$ 3 in the joints (C). Linear models adjusted for group were used to test significance of the linear association.

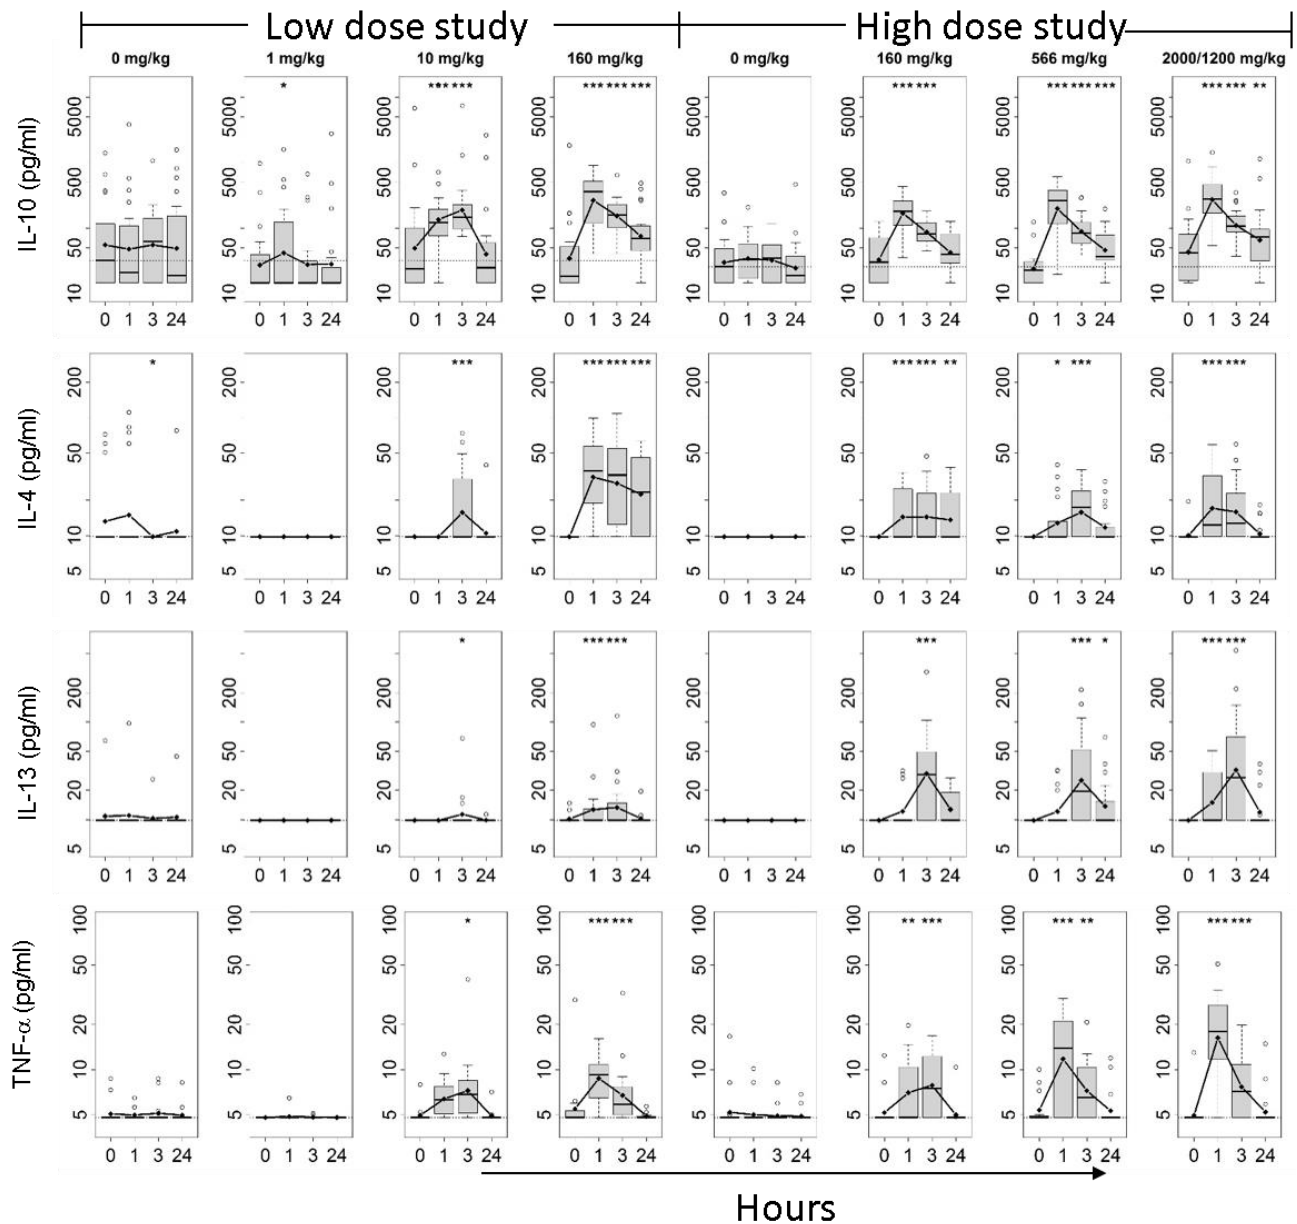

**Supplemental Figure 5. GL-2045 increased levels of circulating cytokines in rats.** Male and female Wistar rats were assigned to 8 groups in two separate studies. GL-2045 was infused IV weekly at different doses for 6 weeks. The highest dose (2000 mg/kg) was reduced to 1200 mg/kg beginning on Day 8 of the dosing phase. Blood samples were collected at different time points and serum cytokine levels were analyzed. Only the day 1 data is shown. Cytokines exhibiting increased concentrations post start of infusion on Day 1 of the dosing phase were IL-4, IL-10, IL-13, and TNF- $\alpha$ ; the increases affected both

sexes at all doses at 1 and/or 3 hours post start of infusion. The number of animals in the low dose study was 20 per group. The number of animals in high dose study: n=30, Vehicle control; n=19, 160 mg/kg; n=20, 566 mg/kg; n=26, 2000/1200 mg/kg. \*p<0.05, \*\*p<0.01, \*\*\*p<0.001, compared with pre-treatment levels (0 hours).

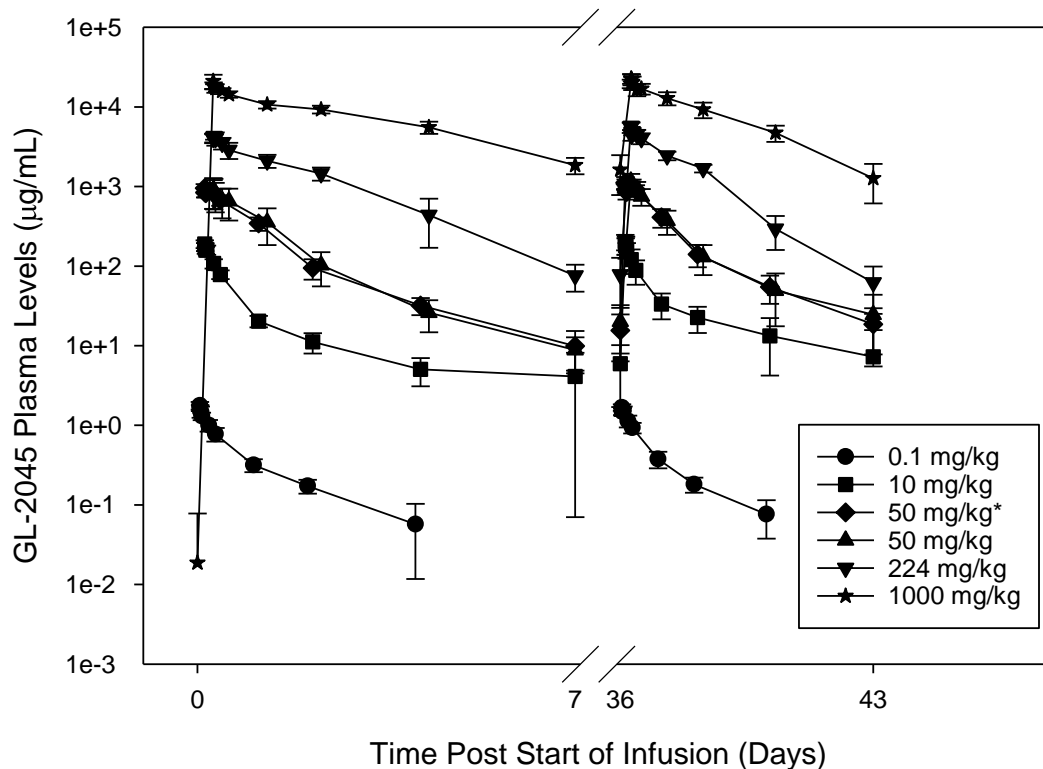

**Supplemental Figure 6. GL-2045 time-concentration profiles in monkeys after the first and sixth weekly IV infusion of GL-2045.** GL-2045 was infused IV weekly at different doses for 6 weeks to male and female cynomolgus monkeys. Doses were 0.1, 10 or 50 mg/kg (Low dose study) and 50, 224 or 1000 mg/kg (High dose study). There were no apparent sex-related differences in systemic exposure as assessed by  $C_{max}$  and  $AUC_{168}$ . Systemic exposure increased with increasing dose, with  $C_{max}$  approximately increasing in proportion to dose and  $AUC_{168}$  increasing slightly greater than in proportion to dose. Exposures after the sixth dose were similar to those after the first. \*Denotes 50 mg/kg group from the Low dose study. Data points represent group means  $\pm$  standard deviation.

| Biomarker             | Low dose study<br>0 mg/kg | Low dose study<br>1 mg/kg | Low dose study<br>10 mg/kg | Low dose study<br>160 mg/kg | High dose study<br>0 mg/kg | High dose study<br>160 mg/kg | High dose study<br>566 mg/kg | High dose study<br>2000/1200 mg/kg |
|-----------------------|---------------------------|---------------------------|----------------------------|-----------------------------|----------------------------|------------------------------|------------------------------|------------------------------------|
| IL-2 (pg/mL)          |                           |                           |                            |                             |                            |                              |                              |                                    |
| 0 hours               | 34.4 (27.6, 42.7)         | 29.9 (24.2, 37.0)         | 39.4 (31.9, 48.7)          | 35.8 (28.9, 44.2)           | 24.4 (23.6, 25.3)          | 24.4 (23.4, 25.4)            | 24.4 (23.4, 25.4)            | 24.4 (23.6, 25.2)                  |
| 1 hours               | 36.8 (29.7, 45.4)         | 31.7 (25.6, 39.2)         | 35.3 (28.5, 43.6)          | 43.7 (35.3, 54.0)           | 24.4 (23.6, 25.2)          | 24.5 (23.5, 25.5)            | 24.4 (23.4, 25.4)            | 24.4 (23.6, 25.2)                  |
| 3 hours               | 34.2 (27.7, 42.3)         | 31.3 (25.3, 38.7)         | 46.8 (37.9, 57.8)          | 42.3 (34.2, 52.3)           | 24.4 (23.6, 25.2)          | 24.8 (23.8, 25.8)            | 24.4 (23.4, 25.4)            | 24.4 (23.6, 25.2)                  |
| 24 hours              | 31.1 (25.2, 38.4)         | 29.1 (23.5, 35.9)         | 27.9 (22.5, 34.4)          | 37.1 (30.0, 45.9)           | 24.4 (23.6, 25.2)          | 26.7 (25.7, 27.8)            | 24.4 (23.4, 25.4)            | 24.4 (23.6, 25.2)                  |
| IL-6 (pg/mL)          |                           |                           |                            |                             |                            |                              |                              |                                    |
| 0 hours               | 192.7 (158.4, 234.5)      | 146.4 (121.4, 176.6)      | 146.4 (121.4, 176.6)       | 146.4 (121.4, 176.6)        | 146.4 (138.0, 155.3)       | 146.4 (136.2, 157.4)         | 146.4 (136.2, 157.4)         | 146.4 (138.0, 155.3)               |
| 1 hours               | 210.5 (174.5, 253.8)      | 146.4 (121.4, 176.6)      | 146.4 (121.4, 176.6)       | 377.1 (312.7, 454.9)        | 146.4 (138.0, 155.3)       | 146.4 (136.2, 157.4)         | 149.8 (139.0, 161.3)         | 156.7 (147.6, 166.4)               |
| 3 hours               | 146.4 (121.4, 176.6)      | 146.4 (121.4, 176.6)      | 277.2 (229.8, 334.4)       | 440.2 (365.0, 530.9)        | 146.4 (138.0, 155.3)       | 153.8 (143.1, 165.3)         | 173.2 (161.1, 186.2)         | 150.2 (141.6, 159.3)               |
| 24 hours              | 172.7 (143.2, 208.3)      | 146.4 (121.4, 176.6)      | 152.2 (126.2, 183.6)       | 212.4 (176.1, 256.1)        | 146.4 (138.0, 155.3)       | 146.4 (136.2, 157.4)         | 146.4 (136.2, 157.4)         | 146.4 (138.0, 155.3)               |
| IL-12p70 (pg/mL)      |                           |                           |                            |                             |                            |                              |                              |                                    |
| 0 hours               | 80.9 (57.1, 114.8)        | 75.7 (54.0, 106.0)        | 67.9 (48.5, 95.2)          | 81.7 (58.3, 114.4)          | 57.3 (45.7, 71.9)          | 49.7 (37.7, 65.6)            | 87.0 (65.9, 114.7)           | 94.2 (75.1, 118.1)                 |
| 1 hours               | 77.2 (55.1, 108.2)        | 74.3 (53.0, 104.1)        | 80.5 (57.5, 112.8)         | 107.3 (76.6, 150.3)         | 64.8 (51.6, 81.2)          | 90.6 (68.7, 119.5)           | 108.2 (81.4, 143.8)          | 143.0 (113.6, 179.9)               |
| 3 hours               | 102.0 (72.8, 143.0)       | 51.0 (36.4, 71.4)         | 99.8 (71.2, 139.8)         | 113.3 (80.8, 158.7)         | 115.2 (91.9, 144.4)        | 148.0 (112.2, 195.3)         | 131.8 (99.9, 173.8)          | 130.5 (104.0, 163.6)               |
| 24 hours              | 70.5 (50.3, 98.8)         | 41.6 (29.7, 58.3)         | 55.4 (39.5, 77.6)          | 87.3 (62.3, 122.3)          | 55.5 (44.3, 69.6)          | 66.4 (50.3, 87.6)            | 77.3 (58.6, 102.0)           | 73.3 (58.5, 91.9)                  |
| IL-17 (pg/mL)         |                           |                           |                            |                             |                            |                              |                              |                                    |
| 0 hours               | 15.5 (14.0, 17.3)         | 14.6 (13.2, 16.2)         | 14.6 (13.2, 16.2)          | 16.0 (14.4, 17.7)           | 14.6 (13.9, 15.4)          | 14.6 (13.7, 15.6)            | 14.6 (13.7, 15.6)            | 14.6 (13.9, 15.4)                  |
| 1 hours               | 16.1 (14.5, 17.8)         | 14.6 (13.2, 16.2)         | 14.8 (13.4, 16.4)          | 19.3 (17.4, 21.4)           | 14.6 (13.9, 15.4)          | 14.6 (13.7, 15.6)            | 14.9 (13.9, 15.9)            | 15.5 (14.7, 16.3)                  |
| 3 hours               | 15.6 (14.1, 17.3)         | 14.6 (13.2, 16.2)         | 19.0 (17.2, 21.1)          | 19.6 (17.7, 21.7)           | 14.6 (13.9, 15.4)          | 15.1 (14.1, 16.1)            | 15.6 (14.6, 16.6)            | 15.2 (14.4, 16.0)                  |
| 24 hours              | 15.5 (14.0, 17.2)         | 14.6 (13.2, 16.2)         | 14.6 (13.2, 16.2)          | 16.5 (14.9, 18.3)           | 14.6 (13.9, 15.4)          | 14.7 (13.8, 15.7)            | 15.8 (14.8, 16.8)            | 15.6 (14.8, 16.4)                  |
| IFN- $\gamma$ (pg/mL) |                           |                           |                            |                             |                            |                              |                              |                                    |
| 0 hours               | 46.7 (38.5, 56.6)         | 29.2 (24.3, 35.1)         | 29.2 (24.3, 35.1)          | 29.2 (24.3, 35.1)           | 29.2 (27.7, 30.8)          | 29.2 (27.4, 31.1)            | 29.2 (27.4, 31.1)            | 29.2 (27.7, 30.8)                  |
| 1 hours               | 50.5 (42.0, 60.7)         | 29.2 (24.3, 35.1)         | 29.2 (24.3, 35.1)          | 29.2 (24.3, 35.1)           | 29.2 (27.7, 30.8)          | 29.2 (27.4, 31.1)            | 29.2 (27.4, 31.2)            | 29.5 (27.9, 31.1)                  |
| 3 hours               | 29.2 (24.3, 35.1)         | 29.2 (24.3, 35.1)         | 29.2 (24.3, 35.1)          | 29.2 (24.3, 35.1)           | 29.2 (27.7, 30.8)          | 29.2 (27.4, 31.1)            | 29.2 (27.4, 31.1)            | 29.2 (27.7, 30.8)                  |
| 24 hours              | 32.9 (27.4, 39.6)         | 29.2 (24.3, 35.1)         | 34.1 (28.4, 41.0)          | 29.2 (24.3, 35.1)           | 29.2 (27.7, 30.8)          | 29.2 (27.4, 31.1)            | 32.7 (30.7, 34.8)            | 33.3 (31.6, 35.0)                  |

### Supplemental Table 1. Least Square Means for GL-2045-induced Cytokine Modulation in rats.

Values represent mean concentrations with 95% Confidence Intervals in brackets for each cytokine measured, in a high dose and low dose study, before and within the first day of dosing.



| Biomarker             | Low dose study<br>0 mg/kg | Low dose study<br>0.1 mg/kg | Low dose study<br>10 mg/kg | Low dose study<br>50 mg/kg | High dose study<br>0 mg/kg | High dose study<br>50 mg/kg | High dose study<br>224 mg/kg | High dose study:<br>1000 mg/kg |
|-----------------------|---------------------------|-----------------------------|----------------------------|----------------------------|----------------------------|-----------------------------|------------------------------|--------------------------------|
| IL-2 (pg/mL)          |                           |                             |                            |                            |                            |                             |                              |                                |
| 0 hours               | 3.2 (2.2, 4.8)            | 5.1 (3.4, 7.6)              | 3.8 (2.6, 5.7)             | 3.9 (2.6, 5.9)             | 9.6 (5.6, 16.5)            | 10.1 (5.0, 20.4)            | 5.0 (2.5, 10.1)              | 5.3 (3.1, 9.0)                 |
| 1 hours               | 3.2 (2.2, 4.8)            | 3.7 (2.5, 5.5)              | 3.2 (2.2, 4.8)             | 3.8 (2.5, 5.6)             | 8.5 (4.9, 14.6)            | 3.5 (1.8, 7.1)              | 3.2 (1.6, 6.4)               | 3.2 (1.9, 5.5)                 |
| 3 hours               | 3.2 (2.2, 4.8)            | 3.8 (2.6, 5.6)              | 3.2 (2.2, 4.8)             | 3.9 (2.6, 5.8)             | 10.2 (5.9, 17.5)           | 3.2 (1.6, 6.4)              | 3.2 (1.6, 6.4)               | 3.2 (1.9, 5.5)                 |
| 24 hours              | 3.2 (2.2, 4.8)            | 4.6 (3.1, 6.8)              | 3.2 (2.2, 4.8)             | 3.9 (2.6, 5.9)             | 11.3 (6.6, 19.5)           | 3.2 (1.6, 6.4)              | 3.2 (1.6, 6.4)               | 3.2 (1.9, 5.5)                 |
| IL-4 (pg/mL)          |                           |                             |                            |                            |                            |                             |                              |                                |
| 0 hours               | 6.8 (3.2, 14.5)           | 4.9 (2.3, 10.4)             | 7.6 (3.6, 16.2)            | 4.9 (2.3, 10.4)            | 4.9 (3.2, 7.5)             | 4.9 (2.8, 8.5)              | 4.9 (2.8, 8.5)               | 8.0 (5.2, 12.2)                |
| 1 hours               | 6.5 (3.0, 13.7)           | 4.9 (2.3, 10.4)             | 7.2 (3.4, 15.3)            | 4.9 (2.3, 10.4)            | 4.9 (3.2, 7.5)             | 4.9 (2.8, 8.5)              | 4.9 (2.8, 8.5)               | 7.4 (4.9, 11.3)                |
| 3 hours               | 6.7 (3.2, 14.2)           | 4.9 (2.3, 10.4)             | 9.9 (4.7, 21.1)            | 6.4 (3.0, 13.5)            | 4.9 (3.2, 7.5)             | 4.9 (2.8, 8.5)              | 4.9 (2.8, 8.5)               | 7.1 (4.7, 10.9)                |
| 24 hours              | 6.0 (2.8, 12.8)           | 4.9 (2.3, 10.4)             | 11.5 (5.4, 24.4)           | 7.4 (3.5, 15.7)            | 4.9 (3.2, 7.5)             | 4.9 (2.8, 8.5)              | 4.9 (2.8, 8.5)               | 4.9 (3.2, 7.5)                 |
| IL-6 (pg/mL)          |                           |                             |                            |                            |                            |                             |                              |                                |
| 0 hours               | 3.2 (1.9, 5.5)            | 5.8 (3.3, 9.9)              | 3.6 (2.1, 6.2)             | 3.2 (1.9, 5.5)             | 8.2 (4.2, 16.1)            | 9.6 (4.0, 23.0)             | 6.2 (2.6, 14.9)              | 5.3 (2.7, 10.3)                |
| 1 hours               | 3.2 (1.9, 5.5)            | 3.9 (2.3, 6.7)              | 3.9 (2.2, 6.7)             | 7.9 (4.5, 13.6)            | 8.9 (4.5, 17.6)            | 3.2 (1.3, 7.7)              | 16.6 (6.9, 39.7)             | 12.4 (6.3, 24.5)               |
| 3 hours               | 3.2 (1.9, 5.5)            | 5.4 (3.1, 9.3)              | 9.2 (5.3, 15.9)            | 5.4 (3.1, 9.3)             | 17.8 (9.0, 34.9)           | 12.2 (5.1, 29.2)            | 12.0 (5.0, 28.7)             | 10.7 (5.5, 21.1)               |
| 24 hours              | 4.5 (2.6, 7.8)            | 4.9 (2.8, 8.4)              | 3.6 (2.1, 6.2)             | 3.2 (1.9, 5.5)             | 15.5 (7.9, 30.4)           | 9.1 (3.8, 21.7)             | 6.4 (2.7, 15.2)              | 5.8 (2.9, 11.4)                |
| IL-12/23p40 (pg/mL)   |                           |                             |                            |                            |                            |                             |                              |                                |
| 0 hours               | 3.2 (1.1, 9.7)            | 15.1 (5.0, 45.7)            | 6.7 (2.2, 20.3)            | 5.0 (1.7, 15.1)            | 28.1 (10.6, 74.5)          | 178.4 (50.5, 629.3)         | 14.8 (4.2, 52.1)             | 14.4 (5.4, 38.2)               |
| 1 hours               | 3.2 (1.1, 9.7)            | 10.1 (3.3, 30.5)            | 4.1 (1.4, 12.5)            | 4.8 (1.6, 14.6)            | 17.9 (6.7, 47.5)           | 13.5 (3.8, 47.5)            | 3.7 (1.0, 12.9)              | 5.1 (1.9, 13.4)                |
| 3 hours               | 3.2 (1.1, 9.7)            | 8.3 (2.7, 25.0)             | 4.0 (1.3, 12.2)            | 4.8 (1.6, 14.6)            | 24.0 (9.1, 63.8)           | 14.3 (4.1, 50.5)            | 4.0 (1.1, 14.1)              | 4.4 (1.7, 11.7)                |
| 24 hours              | 3.2 (1.1, 9.7)            | 10.9 (3.6, 32.8)            | 3.9 (1.3, 11.7)            | 4.0 (1.3, 12.0)            | 33.2 (12.5, 88.1)          | 15.5 (4.4, 54.7)            | 4.0 (1.1, 14.3)              | 5.0 (1.9, 13.3)                |
| IL-13 (pg/mL)         |                           |                             |                            |                            |                            |                             |                              |                                |
| 0 hours               | 3.2 (1.8, 5.8)            | 6.1 (3.4, 11.0)             | 4.8 (2.7, 8.7)             | 3.2 (1.8, 5.8)             | 22.8 (11.2, 46.4)          | 20.5 (8.2, 51.2)            | 9.9 (4.0, 24.8)              | 11.1 (5.5, 22.7)               |
| 1 hours               | 3.2 (1.8, 5.8)            | 5.0 (2.8, 9.0)              | 3.2 (1.8, 5.8)             | 3.2 (1.8, 5.8)             | 16.1 (7.9, 32.8)           | 3.2 (1.3, 8.0)              | 3.2 (1.3, 8.0)               | 3.6 (1.8, 7.3)                 |
| 3 hours               | 3.2 (1.8, 5.8)            | 5.3 (2.9, 9.5)              | 3.2 (1.8, 5.8)             | 3.2 (1.8, 5.8)             | 22.2 (10.9, 45.2)          | 3.2 (1.3, 8.0)              | 3.2 (1.3, 8.0)               | 3.2 (1.6, 6.5)                 |
| 24 hours              | 3.2 (1.8, 5.8)            | 5.5 (3.0, 9.9)              | 3.2 (1.8, 5.8)             | 3.2 (1.8, 5.8)             | 28.1 (13.8, 57.2)          | 3.2 (1.3, 8.0)              | 3.2 (1.3, 8.0)               | 3.2 (1.6, 6.5)                 |
| IL-17 (pg/mL)         |                           |                             |                            |                            |                            |                             |                              |                                |
| 0 hours               | 2.4 (1.4, 4.1)            | 6.6 (3.8, 11.4)             | 3.8 (2.2, 6.5)             | 2.4 (1.4, 4.1)             | 30.2 (16.3, 56.1)          | 24.6 (11.0, 54.6)           | 21.0 (9.5, 46.8)             | 15.5 (8.3, 28.8)               |
| 1 hours               | 2.4 (1.4, 4.1)            | 3.9 (2.3, 6.8)              | 2.4 (1.4, 4.1)             | 2.4 (1.4, 4.1)             | 25.0 (13.5, 46.5)          | 7.0 (3.2, 15.7)             | 7.8 (3.5, 17.4)              | 5.3 (2.8, 9.8)                 |
| 3 hours               | 2.4 (1.4, 4.1)            | 3.6 (2.1, 6.3)              | 2.8 (1.6, 4.9)             | 2.4 (1.4, 4.1)             | 29.7 (16.0, 55.2)          | 10.3 (4.6, 22.9)            | 10.0 (4.5, 22.3)             | 4.9 (2.7, 9.2)                 |
| 24 hours              | 2.4 (1.4, 4.1)            | 4.0 (2.3, 6.9)              | 2.4 (1.4, 4.1)             | 2.4 (1.4, 4.1)             | 32.8 (17.7, 61.0)          | 7.8 (3.5, 17.4)             | 7.2 (3.2, 15.9)              | 4.8 (2.6, 8.9)                 |
| IFN- $\gamma$ (pg/mL) |                           |                             |                            |                            |                            |                             |                              |                                |
| 0 hours               | 3.2 (2.4, 4.3)            | 5.0 (3.7, 6.6)              | 4.1 (3.1, 5.4)             | 3.7 (2.8, 4.9)             | 3.9 (3.0, 5.1)             | 9.5 (6.8, 13.3)             | 3.8 (2.7, 5.4)               | 3.6 (2.8, 4.7)                 |
| 1 hours               | 3.2 (2.4, 4.3)            | 3.2 (2.4, 4.3)              | 3.2 (2.4, 4.3)             | 3.6 (2.7, 4.8)             | 3.6 (2.8, 4.7)             | 3.9 (2.8, 5.4)              | 3.2 (2.3, 4.5)               | 3.2 (2.5, 4.2)                 |
| 3 hours               | 3.2 (2.4, 4.3)            | 3.7 (2.8, 4.9)              | 3.2 (2.4, 4.3)             | 3.3 (2.5, 4.4)             | 4.0 (3.1, 5.2)             | 4.0 (2.8, 5.5)              | 3.3 (2.3, 4.6)               | 3.2 (2.5, 4.2)                 |
| 24 hours              | 3.2 (2.4, 4.3)            | 3.9 (2.9, 5.2)              | 3.2 (2.4, 4.3)             | 3.2 (2.4, 4.3)             | 5.6 (4.3, 7.2)             | 3.2 (2.3, 4.5)              | 3.5 (2.5, 5.0)               | 3.3 (2.6, 4.3)                 |
| TNF- $\alpha$ (pg/mL) |                           |                             |                            |                            |                            |                             |                              |                                |
| 0 hours               | 16.0 (7.7, 33.1)          | 31.8 (15.4, 65.8)           | 31.4 (15.2, 64.9)          | 17.8 (8.6, 36.8)           | 25.4 (15.9, 40.7)          | 44.9 (24.4, 82.4)           | 19.1 (10.4, 35.1)            | 20.8 (13.0, 33.3)              |
| 1 hours               | 16.0 (7.7, 33.1)          | 22.8 (11.0, 47.2)           | 19.7 (9.5, 40.8)           | 26.4 (12.8, 54.6)          | 25.3 (15.8, 40.6)          | 16.0 (8.7, 29.4)            | 16.0 (8.7, 29.4)             | 17.1 (10.7, 27.4)              |
| 3 hours               | 16.0 (7.7, 33.1)          | 29.4 (14.2, 60.8)           | 22.3 (10.8, 46.2)          | 19.9 (9.6, 41.2)           | 26.9 (16.8, 43.0)          | 16.0 (8.7, 29.4)            | 16.0 (8.7, 29.4)             | 16.0 (10.0, 25.6)              |
| 24 hours              | 16.0 (7.7, 33.1)          | 30.5 (14.7, 63.0)           | 21.3 (10.3, 43.9)          | 16.0 (7.7, 33.1)           | 27.5 (17.2, 44.0)          | 16.0 (8.7, 29.4)            | 16.0 (8.7, 29.4)             | 16.0 (10.0, 25.6)              |

**Supplemental Table 2. Least Square Means for GL-2045-induced Cytokine Modulation in NHPs.**

Values represent mean concentrations with 95% Confidence Intervals in brackets for each cytokine measured, in a high dose and low dose study, before and within the first day of dosing.
